# Supplementary material for: Reconstruction of Gene Regulatory Modules in Cancer Cell Cycle by Multi-Source Data Integration
Source: PubMed Central journal article supplement (PMC2858157; doi:10.1371/journal.pone.0010268), 2010-04-21
Supplement: pone.0010268.s001.pdf [file pone.0010268.s001.pdf]

| Cluster # | Number of genes in this cluster | Number of genes in this GO category | P-value    | GO category        | Enriched functional category                            |
|-----------|---------------------------------|-------------------------------------|------------|--------------------|---------------------------------------------------------|
| 1         | 8                               | 323                                 | 1.60E-08   | GO:0000278         | mitotic cell cycle                                      |
|           | 3                               | 5                                   | 2.70E-08   | GO:0004756         | selenide, water dikinase activity                       |
|           | 3                               | 5                                   | 2.70E-08   | GO:0016781         | phosphotransferase activity, paired acceptors           |
|           | 10                              | 810                                 | 1.50E-07   | GO:0007049         | cell cycle                                              |
|           | 8                               | 452                                 | 2.20E-07   | GO:0022402         | cell cycle process                                      |
|           | 7                               | 359                                 | 7.10E-07   | GO:0022403         | cell cycle phase                                        |
|           | 3                               | 20                                  | 3.00E-06   | GO:0004571         | mannosyl-oligosaccharide 1,2-alpha-mannosidase activity |
|           | 3                               | 22                                  | 4.10E-06   | GO:0015924         | mannosyl-oligosaccharide mannosidase activity           |
|           | 3                               | 29                                  | 9.70E-06   | GO:0015923         | mannosidase activity                                    |
|           | 12                              | 2263                                | 5.00E-05   | GO:0005524         | ATP binding                                             |
| 2         | 8                               | 323                                 | 5.20E-08   | GO:0000278         | mitotic cell cycle                                      |
|           | 8                               | 359                                 | 1.20E-07   | GO:0022403         | cell cycle phase                                        |
|           | 13                              | 1436                                | 3.40E-07   | GO:0006793         | phosphorus metabolic process                            |
|           | 13                              | 1436                                | 3.40E-07   | GO:0006796         | phosphate metabolic process                             |
|           | 10                              | 810                                 | 6.30E-07   | GO:0007049         | cell cycle                                              |
|           | 8                               | 452                                 | 6.70E-07   | GO:0022402         | cell cycle process                                      |
|           | 6                               | 292                                 | 8.20E-06   | GO:0000279         | M phase                                                 |
|           | 10                              | 1187                                | 1.90E-05   | GO:0016310         | phosphorylation                                         |
|           | 31                              | 10329                               | 2.70E-05   | GO:0044237         | cellular metabolic process                              |
|           | 15                              | 2823                                | 2.70E-05   | GO:0032553         | ribonucleotide binding                                  |
|           | 15                              | 2823                                | 2.70E-05   | GO:0032555         | purine ribonucleotide binding                           |
|           | 5                               | 218                                 | 2.90E-05   | GO:0007067         | mitosis                                                 |
|           | 24                              | 6657                                | 3.00E-05   | GO:0043283         | biopolymer metabolic process                            |
|           | 5                               | 223                                 | 3.30E-05   | GO:0000087         | M phase of mitotic cell cycle                           |
|           | 15                              | 2934                                | 4.30E-05   | GO:0017076         | purine nucleotide binding                               |
| 16        | 3353                            | 5.10E-05                            | GO:0000166 | nucleotide binding |                                                         |

| Cluster # | Number of genes in this cluster | Number of genes in this GO category | P-value    | GO category                            | Enriched functional category                                |
|-----------|---------------------------------|-------------------------------------|------------|----------------------------------------|-------------------------------------------------------------|
| 4         | 3                               | 5                                   | 1.00E-09   | GO:0006597                             | spermine biosynthetic process                               |
|           | 3                               | 5                                   | 1.00E-09   | GO:0008215                             | spermine metabolic process                                  |
|           | 3                               | 6                                   | 2.00E-09   | GO:0004014                             | adenosylmethionine decarboxylase activity                   |
|           | 3                               | 8                                   | 5.60E-09   | GO:0008295                             | spermidine biosynthetic process                             |
|           | 3                               | 9                                   | 8.40E-09   | GO:0008216                             | spermidine metabolic process                                |
|           | 3                               | 12                                  | 2.20E-08   | GO:0006596                             | polyamine biosynthetic process                              |
|           | 3                               | 15                                  | 4.50E-08   | GO:0006595                             | polyamine metabolic process                                 |
|           | 3                               | 32                                  | 4.90E-07   | GO:0042401                             | biogenic amine biosynthetic process                         |
|           | 3                               | 36                                  | 7.10E-07   | GO:0042398                             | amino acid derivative biosynthetic process                  |
|           | 3                               | 51                                  | 2.10E-06   | GO:0016831                             | carboxy-lyase activity                                      |
|           | 3                               | 69                                  | 5.10E-06   | GO:0016830                             | carbon-carbon lyase activity                                |
|           | 3                               | 71                                  | 5.60E-06   | GO:0006576                             | biogenic amine metabolic process                            |
|           | 3                               | 86                                  | 1.00E-05   | GO:0006575                             | amino acid derivative metabolic process                     |
|           | 3                               | 94                                  | 1.30E-05   | GO:0009309                             | amine biosynthetic process                                  |
| 3         | 122                             | 2.90E-05                            | GO:0044271 | nitrogen compound biosynthetic process |                                                             |
| 5         | 2                               | 103                                 | 0.0002     | GO:0009314                             | response to radiation                                       |
| 6         | 4                               | 31                                  | 2.50E-08   | GO:0004707                             | MAP kinase activity                                         |
|           | 5                               | 157                                 | 4.70E-07   | GO:0031497                             | chromatin assembly                                          |
|           | 4                               | 70                                  | 7.10E-07   | GO:0004702                             | receptor signaling protein serine/threonine kinase activity |
|           | 5                               | 186                                 | 1.10E-06   | GO:0006323                             | DNA packaging                                               |
|           | 5                               | 209                                 | 1.90E-06   | GO:0006333                             | chromatin assembly or disassembly                           |
|           | 4                               | 100                                 | 3.00E-06   | GO:0000786                             | nucleosome                                                  |
|           | 5                               | 250                                 | 4.60E-06   | GO:0000785                             | chromatin                                                   |
|           | 6                               | 470                                 | 6.00E-06   | GO:0051276                             | chromosome organization and biogenesis                      |
|           | 4                               | 139                                 | 1.10E-05   | GO:0006334                             | nucleosome assembly                                         |
|           | 20                              | 8814                                | 1.70E-05   | GO:0043170                             | macromolecule metabolic process                             |
|           | 4                               | 168                                 | 2.30E-05   | GO:0005057                             | receptor signaling protein activity                         |
|           | 5                               | 386                                 | 3.70E-05   | GO:0044427                             | chromosomal part                                            |
|           | 5                               | 387                                 | 3.80E-05   | GO:0006325                             | establishment and/or maintenance of chromatin architecture  |
|           | 10                              | 2263                                | 4.00E-05   | GO:0005524                             | ATP binding                                                 |
| 27        | 17624                           | 4.30E-05                            | GO:0005488 | binding                                |                                                             |
| 10        | 2286                            | 4.40E-05                            | GO:0032559 | adenyl ribonucleotide binding          |                                                             |
| 10        | 2392                            | 6.40E-05                            | GO:0030554 | adenyl nucleotide binding              |                                                             |
| 7         | 2                               | 38                                  | 1.80E-05   | GO:0019722                             | calcium-mediated signaling                                  |

| Cluster # | Number of genes in this cluster | Number of genes in this GO category | P-value  | GO category | Enriched functional category                            |
|-----------|---------------------------------|-------------------------------------|----------|-------------|---------------------------------------------------------|
| 8         | 3                               | 32                                  | 9.20E-07 | GO:0000910  | cytokinesis                                             |
|           | 3                               | 36                                  | 1.30E-06 | GO:0006270  | DNA replication initiation                              |
|           | 4                               | 223                                 | 8.70E-06 | GO:0000087  | M phase of mitotic cell cycle                           |
|           | 3                               | 73                                  | 1.10E-05 | GO:0008094  | DNA-dependent ATPase activity                           |
|           | 3                               | 136                                 | 7.30E-05 | GO:0006261  | DNA-dependent DNA replication                           |
| 9         | 9                               | 292                                 | 7.60E-09 | GO:0000279  | M phase                                                 |
|           | 8                               | 223                                 | 1.70E-08 | GO:0000087  | M phase of mitotic cell cycle                           |
|           | 10                              | 452                                 | 2.40E-08 | GO:0022402  | cell cycle process                                      |
|           | 9                               | 359                                 | 4.50E-08 | GO:0022403  | cell cycle phase                                        |
|           | 12                              | 810                                 | 6.90E-08 | GO:0007049  | cell cycle                                              |
|           | 11                              | 679                                 | 1.10E-07 | GO:0006259  | DNA metabolic process                                   |
|           | 8                               | 323                                 | 3.00E-07 | GO:0000278  | mitotic cell cycle                                      |
|           | 7                               | 218                                 | 3.00E-07 | GO:0007067  | mitosis                                                 |
|           | 6                               | 141                                 | 4.40E-07 | GO:0007218  | neuropeptide signaling pathway                          |
|           | 8                               | 470                                 | 4.80E-06 | GO:0051276  | chromosome organization and biogenesis                  |
|           | 26                              | 5551                                | 9.70E-06 | GO:0005634  | nucleus                                                 |
|           | 4                               | 73                                  | 1.50E-05 | GO:0008094  | DNA-dependent ATPase activity                           |
|           | 49                              | 16682                               | 1.50E-05 | GO:0009987  | cellular process                                        |
|           | 4                               | 75                                  | 1.70E-05 | GO:0000775  | chromosome, pericentric region                          |
|           | 3                               | 36                                  | 5.50E-05 | GO:0006270  | DNA replication initiation                              |
| 12        | 4                               | 14                                  | 1.40E-09 | GO:0008191  | metalloendopeptidase inhibitor activity                 |
|           | 4                               | 60                                  | 6.60E-07 | GO:0007059  | chromosome segregation                                  |
|           | 3                               | 20                                  | 1.50E-06 | GO:0004571  | mannosyl-oligosaccharide 1,2-alpha-mannosidase activity |
|           | 3                               | 22                                  | 2.10E-06 | GO:0015924  | mannosyl-oligosaccharide mannosidase activity           |
|           | 3                               | 29                                  | 4.90E-06 | GO:0000070  | mitotic sister chromatid segregation                    |
|           | 3                               | 29                                  | 4.90E-06 | GO:0015923  | mannosidase activity                                    |
|           | 3                               | 30                                  | 5.40E-06 | GO:0000819  | sister chromatid segregation                            |

| Cluster # | Number of genes in this cluster | Number of genes in this GO category | P-value    | GO category           | Enriched functional category                            |
|-----------|---------------------------------|-------------------------------------|------------|-----------------------|---------------------------------------------------------|
| 15        | 7                               | 333                                 | 5.20E-08   | GO:0006260            | DNA replication                                         |
|           | 7                               | 679                                 | 6.10E-06   | GO:0006259            | DNA metabolic process                                   |
|           | 3                               | 36                                  | 7.80E-06   | GO:0006270            | DNA replication initiation                              |
|           | 17                              | 5551                                | 9.40E-06   | GO:0005634            | nucleus                                                 |
|           | 4                               | 132                                 | 1.20E-05   | GO:0005813            | centrosome                                              |
|           | 4                               | 136                                 | 1.30E-05   | GO:0006261            | DNA-dependent DNA replication                           |
|           | 4                               | 146                                 | 1.80E-05   | GO:0005815            | microtubule organizing center                           |
|           | 7                               | 810                                 | 1.90E-05   | GO:0007049            | cell cycle                                              |
|           | 5                               | 323                                 | 2.20E-05   | GO:0000278            | mitotic cell cycle                                      |
|           | 2                               | 7                                   | 2.30E-05   | GO:0045931            | positive regulation of mitotic cell cycle               |
|           | 11                              | 2607                                | 4.70E-05   | GO:0043234            | protein complex                                         |
| 16        | 10                              | 1312                                | 1.30E-06   | GO:0003700            | transcription factor activity                           |
|           | 2                               | 3                                   | 3.80E-06   | GO:0004146            | dihydrofolate reductase activity                        |
|           | 2                               | 4                                   | 7.60E-06   | GO:0006545            | glycine biosynthetic process                            |
|           | 25                              | 11558                               | 2.50E-05   | GO:0008152            | metabolic process                                       |
|           | 10                              | 1870                                | 2.90E-05   | GO:0030528            | transcription regulator activity                        |
|           | 17                              | 5551                                | 2.90E-05   | GO:0005634            | nucleus                                                 |
|           | 2                               | 10                                  | 5.70E-05   | GO:0009070            | serine family amino acid biosynthetic process           |
| 17        | 5                               | 76                                  | 1.80E-08   | GO:0005643            | nuclear pore                                            |
|           | 5                               | 85                                  | 3.10E-08   | GO:0046930            | pore complex                                            |
|           | 6                               | 188                                 | 4.40E-08   | GO:0005635            | nuclear envelope                                        |
|           | 5                               | 104                                 | 8.60E-08   | GO:0044453            | nuclear membrane part                                   |
|           | 5                               | 144                                 | 4.40E-07   | GO:0031965            | nuclear membrane                                        |
|           | 9                               | 1090                                | 1.40E-06   | GO:0044428            | nuclear part                                            |
|           | 12                              | 2607                                | 7.40E-06   | GO:0043234            | protein complex                                         |
|           | 5                               | 260                                 | 7.90E-06   | GO:0019932            | second-messenger-mediated signaling                     |
|           | 2                               | 5                                   | 1.10E-05   | GO:0046934            | phosphatidylinositol-4,5-bisphosphate 3-kinase activity |
|           | 6                               | 598                                 | 3.60E-05   | GO:0031967            | organelle envelope                                      |
|           | 6                               | 600                                 | 3.70E-05   | GO:0031975            | envelope                                                |
|           | 16                              | 5551                                | 4.80E-05   | GO:0005634            | nucleus                                                 |
|           | 12                              | 3215                                | 6.20E-05   | GO:0032991            | macromolecular complex                                  |
| 6         | 679                             | 7.30E-05                            | GO:0006259 | DNA metabolic process |                                                         |

| Cluster # | Number of genes in this cluster | Number of genes in this GO category | P-value  | GO category | Enriched functional category                   |
|-----------|---------------------------------|-------------------------------------|----------|-------------|------------------------------------------------|
| 18        | 10                              | 2263                                | 7.90E-05 | GO:0005524  | ATP binding                                    |
| 19        | 2                               | 6                                   | 4.60E-06 | GO:0005521  | lamin binding                                  |
|           | 2                               | 33                                  | 0.00016  | GO:0000159  | protein phosphatase type 2A complex            |
| 20        | 12                              | 1388                                | 1.30E-06 | GO:0006996  | organelle organization and biogenesis          |
|           | 7                               | 386                                 | 2.60E-06 | GO:0044427  | chromosomal part                               |
|           | 5                               | 153                                 | 4.70E-06 | GO:0007018  | microtubule-based movement                     |
|           | 7                               | 454                                 | 7.60E-06 | GO:0005694  | chromosome                                     |
|           | 5                               | 174                                 | 8.80E-06 | GO:0030705  | cytoskeleton-dependent intracellular transport |
|           | 4                               | 100                                 | 2.10E-05 | GO:0000786  | nucleosome                                     |
|           | 15                              | 2871                                | 2.50E-05 | GO:0016043  | cellular component organization and biogenesis |
|           | 2                               | 5                                   | 2.50E-05 | GO:0004963  | follicle-stimulating hormone receptor activity |
|           | 4                               | 121                                 | 4.30E-05 | GO:0003777  | microtubule motor activity                     |
| 21        | 14                              | 810                                 | 1.70E-09 | GO:0007049  | cell cycle                                     |
|           | 29                              | 5551                                | 1.10E-06 | GO:0005634  | nucleus                                        |
|           | 7                               | 298                                 | 3.90E-06 | GO:0051726  | regulation of cell cycle                       |
|           | 7                               | 359                                 | 1.30E-05 | GO:0022403  | cell cycle phase                               |
|           | 2                               | 3                                   | 1.40E-05 | GO:0004146  | dihydrofolate reductase activity               |
|           | 34                              | 8221                                | 1.60E-05 | GO:0043231  | intracellular membrane-bounded organelle       |
|           | 34                              | 8223                                | 1.60E-05 | GO:0043227  | membrane-bounded organelle                     |
|           | 2                               | 4                                   | 2.80E-05 | GO:0006545  | glycine biosynthetic process                   |

| Cluster # | Number of genes in this cluster | Number of genes in this GO category | P-value    | GO category                                    | Enriched functional category                            |
|-----------|---------------------------------|-------------------------------------|------------|------------------------------------------------|---------------------------------------------------------|
| 22        | 6                               | 15                                  | 8.20E-13   | GO:0004957                                     | prostaglandin E receptor activity                       |
|           | 6                               | 19                                  | 4.40E-12   | GO:0004955                                     | prostaglandin receptor activity                         |
|           | 6                               | 23                                  | 1.60E-11   | GO:0004953                                     | icosanoid receptor activity                             |
|           | 6                               | 23                                  | 1.60E-11   | GO:0004954                                     | prostanoid receptor activity                            |
|           | 13                              | 679                                 | 8.50E-09   | GO:0006259                                     | DNA metabolic process                                   |
|           | 9                               | 333                                 | 1.20E-07   | GO:0006260                                     | DNA replication                                         |
|           | 9                               | 359                                 | 2.20E-07   | GO:0022403                                     | cell cycle phase                                        |
|           | 6                               | 136                                 | 1.00E-06   | GO:0006261                                     | DNA-dependent DNA replication                           |
|           | 9                               | 452                                 | 1.50E-06   | GO:0022402                                     | cell cycle process                                      |
|           | 8                               | 354                                 | 2.30E-06   | GO:0006281                                     | DNA repair                                              |
|           | 11                              | 810                                 | 3.90E-06   | GO:0007049                                     | cell cycle                                              |
|           | 3                               | 13                                  | 3.90E-06   | GO:0006268                                     | DNA unwinding during replication                        |
|           | 3                               | 15                                  | 6.10E-06   | GO:0032392                                     | DNA geometric change                                    |
|           | 3                               | 15                                  | 6.10E-06   | GO:0032508                                     | DNA duplex unwinding                                    |
|           | 7                               | 292                                 | 7.10E-06   | GO:0000279                                     | M phase                                                 |
|           | 8                               | 414                                 | 7.40E-06   | GO:0006974                                     | response to DNA damage stimulus                         |
|           | 7                               | 323                                 | 1.40E-05   | GO:0000278                                     | mitotic cell cycle                                      |
|           | 3                               | 20                                  | 1.50E-05   | GO:0004571                                     | mannosyl-oligosaccharide 1,2-alpha-mannosidase activity |
|           | 2                               | 3                                   | 1.70E-05   | GO:0006271                                     | DNA strand elongation during DNA replication            |
|           | 2                               | 3                                   | 1.70E-05   | GO:0022616                                     | DNA strand elongation                                   |
|           | 3                               | 22                                  | 2.10E-05   | GO:0015924                                     | mannosyl-oligosaccharide mannosidase activity           |
|           | 32                              | 6657                                | 2.40E-05   | GO:0043283                                     | biopolymer metabolic process                            |
|           | 6                               | 245                                 | 3.00E-05   | GO:0051301                                     | cell division                                           |
|           | 4                               | 73                                  | 3.10E-05   | GO:0008094                                     | DNA-dependent ATPase activity                           |
|           | 8                               | 505                                 | 3.10E-05   | GO:0009719                                     | response to endogenous stimulus                         |
|           | 3                               | 29                                  | 4.80E-05   | GO:0015923                                     | mannosidase activity                                    |
| 36        | 8319                            | 5.40E-05                            | GO:0005515 | protein binding                                |                                                         |
| 2         | 5                               | 5.80E-05                            | GO:0004963 | follicle-stimulating hormone receptor activity |                                                         |

| Cluster # | Number of genes in this cluster | Number of genes in this GO category | P-value    | GO category          | Enriched functional category                 |
|-----------|---------------------------------|-------------------------------------|------------|----------------------|----------------------------------------------|
| 24        | 27                              | 5551                                | 7.00E-07   | GO:0005634           | nucleus                                      |
|           | 17                              | 2346                                | 1.10E-06   | GO:0043228           | non-membrane-bounded organelle               |
|           | 17                              | 2346                                | 1.10E-06   | GO:0043232           | intracellular non-membrane-bounded organelle |
|           | 7                               | 333                                 | 3.50E-06   | GO:0006260           | DNA replication                              |
|           | 21                              | 3862                                | 4.40E-06   | GO:0044446           | intracellular organelle part                 |
|           | 21                              | 3872                                | 4.60E-06   | GO:0044422           | organelle part                               |
|           | 32                              | 8221                                | 4.90E-06   | GO:0043231           | intracellular membrane-bounded organelle     |
|           | 32                              | 8223                                | 4.90E-06   | GO:0043227           | membrane-bounded organelle                   |
|           | 35                              | 9656                                | 5.50E-06   | GO:0043229           | intracellular organelle                      |
|           | 35                              | 9661                                | 5.60E-06   | GO:0043226           | organelle                                    |
|           | 9                               | 679                                 | 5.60E-06   | GO:0006259           | DNA metabolic process                        |
|           | 32                              | 8319                                | 6.40E-06   | GO:0005515           | protein binding                              |
|           | 7                               | 386                                 | 9.20E-06   | GO:0044427           | chromosomal part                             |
|           | 3                               | 28                                  | 2.20E-05   | GO:0006275           | regulation of DNA replication                |
|           | 7                               | 454                                 | 2.60E-05   | GO:0005694           | chromosome                                   |
|           | 2                               | 5                                   | 3.70E-05   | GO:0005652           | nuclear lamina                               |
|           | 10                              | 1084                                | 3.70E-05   | GO:0005198           | structural molecule activity                 |
| 3         | 34                              | 3.90E-05                            | GO:0006284 | base-excision repair |                                              |
| 25        | 2                               | 3                                   | 1.80E-06   | GO:0031616           | spindle pole centrosome                      |
|           | 4                               | 162                                 | 7.30E-06   | GO:0005179           | hormone activity                             |

| Cluster # | Number of genes in this cluster | Number of genes in this GO category | P-value    | GO category                             | Enriched functional category                                        |
|-----------|---------------------------------|-------------------------------------|------------|-----------------------------------------|---------------------------------------------------------------------|
| 26        | 3                               | 3                                   | 2.70E-09   | GO:0004799                              | thymidylate synthase activity                                       |
|           | 3                               | 3                                   | 2.70E-09   | GO:0006231                              | dTMP biosynthetic process                                           |
|           | 3                               | 3                                   | 2.70E-09   | GO:0009157                              | deoxyribonucleoside monophosphate biosynthetic process              |
|           | 3                               | 3                                   | 2.70E-09   | GO:0009162                              | deoxyribonucleoside monophosphate metabolic process                 |
|           | 3                               | 3                                   | 2.70E-09   | GO:0009176                              | pyrimidine deoxyribonucleoside monophosphate metabolic process      |
|           | 3                               | 3                                   | 2.70E-09   | GO:0009177                              | pyrimidine deoxyribonucleoside monophosphate biosynthetic process   |
|           | 3                               | 3                                   | 2.70E-09   | GO:0042083                              | 5,10-methylenetetrahydrofolate-dependent methyltransferase activity |
|           | 3                               | 3                                   | 2.70E-09   | GO:0046073                              | dTMP metabolic process                                              |
|           | 3                               | 5                                   | 2.70E-08   | GO:0006597                              | spermine biosynthetic process                                       |
|           | 3                               | 5                                   | 2.70E-08   | GO:0008215                              | spermine metabolic process                                          |
|           | 3                               | 5                                   | 2.70E-08   | GO:0009129                              | pyrimidine nucleoside monophosphate metabolic process               |
|           | 3                               | 5                                   | 2.70E-08   | GO:0009130                              | pyrimidine nucleoside monophosphate biosynthetic process            |
|           | 3                               | 5                                   | 2.70E-08   | GO:0009221                              | pyrimidine deoxyribonucleotide biosynthetic process                 |
|           | 3                               | 6                                   | 5.40E-08   | GO:0004014                              | adenosylmethionine decarboxylase activity                           |
|           | 3                               | 6                                   | 5.40E-08   | GO:0009263                              | deoxyribonucleotide biosynthetic process                            |
|           | 3                               | 8                                   | 1.50E-07   | GO:0008295                              | spermidine biosynthetic process                                     |
|           | 3                               | 9                                   | 2.30E-07   | GO:0008216                              | spermidine metabolic process                                        |
|           | 3                               | 12                                  | 5.90E-07   | GO:0006596                              | polyamine biosynthetic process                                      |
|           | 3                               | 14                                  | 9.80E-07   | GO:0009219                              | pyrimidine deoxyribonucleotide metabolic process                    |
|           | 3                               | 15                                  | 1.20E-06   | GO:0006595                              | polyamine metabolic process                                         |
|           | 3                               | 19                                  | 2.60E-06   | GO:0009262                              | deoxyribonucleotide metabolic process                               |
|           | 3                               | 32                                  | 1.30E-05   | GO:0042401                              | biogenic amine biosynthetic process                                 |
|           | 3                               | 33                                  | 1.40E-05   | GO:0009123                              | nucleoside monophosphate metabolic process                          |
|           | 3                               | 33                                  | 1.40E-05   | GO:0009124                              | nucleoside monophosphate biosynthetic process                       |
|           | 3                               | 36                                  | 1.90E-05   | GO:0042398                              | amino acid derivative biosynthetic process                          |
|           | 3                               | 38                                  | 2.20E-05   | GO:0006221                              | pyrimidine nucleotide biosynthetic process                          |
| 3         | 51                              | 5.40E-05                            | GO:0006220 | pyrimidine nucleotide metabolic process |                                                                     |
| 3         | 51                              | 5.40E-05                            | GO:0016831 | carboxy-lyase activity                  |                                                                     |



| Cluster # | Number of genes in this cluster | Number of genes in this GO category | P-value  | GO category | Enriched functional category                       |
|-----------|---------------------------------|-------------------------------------|----------|-------------|----------------------------------------------------|
| 27        | 3                               | 9                                   | 5.30E-08 | GO:0016538  | cyclin-dependent protein kinase regulator activity |
|           | 9                               | 1388                                | 1.80E-06 | GO:0006996  | organelle organization and biogenesis              |
|           | 2                               | 3                                   | 2.30E-06 | GO:0004146  | dihydrofolate reductase activity                   |
|           | 2                               | 4                                   | 4.60E-06 | GO:0006545  | glycine biosynthetic process                       |
|           | 5                               | 386                                 | 2.10E-05 | GO:0044427  | chromosomal part                                   |
|           | 2                               | 10                                  | 3.40E-05 | GO:0009070  | serine family amino acid biosynthetic process      |
|           | 5                               | 454                                 | 4.50E-05 | GO:0005694  | chromosome                                         |
|           | 5                               | 470                                 | 5.30E-05 | GO:0051276  | chromosome organization and biogenesis             |
|           | 6                               | 810                                 | 6.40E-05 | GO:0007049  | cell cycle                                         |
| 28        | 4                               | 245                                 | 3.90E-06 | GO:0051301  | cell division                                      |
| 29        | 6                               | 292                                 | 8.00E-08 | GO:0000279  | M phase                                            |
|           | 6                               | 323                                 | 1.50E-07 | GO:0000278  | mitotic cell cycle                                 |
|           | 4                               | 75                                  | 3.40E-07 | GO:0005819  | spindle                                            |
|           | 5                               | 223                                 | 7.30E-07 | GO:0000087  | M phase of mitotic cell cycle                      |
|           | 3                               | 24                                  | 8.50E-07 | GO:0000922  | spindle pole                                       |
|           | 2                               | 3                                   | 1.80E-06 | GO:0031616  | spindle pole centrosome                            |
|           | 4                               | 245                                 | 3.70E-05 | GO:0051301  | cell division                                      |
| 30        | 2                               | 44                                  | 8.70E-05 | GO:0030693  | caspase activity                                   |
| 31        | 8                               | 638                                 | 1.90E-06 | GO:0007010  | cytoskeleton organization and biogenesis           |
|           | 4                               | 75                                  | 3.30E-06 | GO:0000775  | chromosome, pericentric region                     |
|           | 10                              | 1388                                | 1.20E-05 | GO:0006996  | organelle organization and biogenesis              |
|           | 6                               | 386                                 | 1.30E-05 | GO:0044427  | chromosomal part                                   |
|           | 5                               | 238                                 | 1.70E-05 | GO:0030036  | actin cytoskeleton organization and biogenesis     |
|           | 5                               | 256                                 | 2.40E-05 | GO:0030029  | actin filament-based process                       |
|           | 6                               | 452                                 | 3.10E-05 | GO:0022402  | cell cycle process                                 |
|           | 6                               | 454                                 | 3.20E-05 | GO:0005694  | chromosome                                         |
|           | 12                              | 2346                                | 4.10E-05 | GO:0043228  | non-membrane-bounded organelle                     |
|           | 12                              | 2346                                | 4.10E-05 | GO:0043232  | intracellular non-membrane-bounded organelle       |
|           | 5                               | 292                                 | 4.60E-05 | GO:0000279  | M phase                                            |

| Cluster # | Number of genes in this cluster | Number of genes in this GO category | P-value  | GO category | Enriched functional category                       |
|-----------|---------------------------------|-------------------------------------|----------|-------------|----------------------------------------------------|
| 32        | 3                               | 9                                   | 1.30E-06 | GO:0016538  | cyclin-dependent protein kinase regulator activity |
|           | 6                               | 202                                 | 1.20E-05 | GO:0019787  | small conjugating protein ligase activity          |
|           | 6                               | 239                                 | 3.10E-05 | GO:0016881  | acid-amino acid ligase activity                    |
|           | 7                               | 386                                 | 5.20E-05 | GO:0044427  | chromosomal part                                   |
| 33        | 7                               | 679                                 | 2.60E-08 | GO:0006259  | DNA metabolic process                              |
|           | 5                               | 810                                 | 4.80E-05 | GO:0007049  | cell cycle                                         |
|           | 4                               | 414                                 | 5.70E-05 | GO:0006974  | response to DNA damage stimulus                    |
|           | 11                              | 6657                                | 7.10E-05 | GO:0043283  | biopolymer metabolic process                       |
|           | 10                              | 5551                                | 0.00011  | GO:0005634  | nucleus                                            |

| Cluster # | Number of genes in this cluster | Number of genes in this GO category | P-value    | GO category           | Enriched functional category                       |
|-----------|---------------------------------|-------------------------------------|------------|-----------------------|----------------------------------------------------|
| 34        | 11                              | 292                                 | 1.70E-10   | GO:0000279            | M phase                                            |
|           | 10                              | 218                                 | 1.80E-10   | GO:0007067            | mitosis                                            |
|           | 10                              | 223                                 | 2.20E-10   | GO:0000087            | M phase of mitotic cell cycle                      |
|           | 10                              | 245                                 | 5.60E-10   | GO:0051301            | cell division                                      |
|           | 11                              | 359                                 | 1.50E-09   | GO:0022403            | cell cycle phase                                   |
|           | 10                              | 323                                 | 8.00E-09   | GO:0000278            | mitotic cell cycle                                 |
|           | 11                              | 452                                 | 1.60E-08   | GO:0022402            | cell cycle process                                 |
|           | 3                               | 5                                   | 1.50E-07   | GO:0006597            | spermine biosynthetic process                      |
|           | 3                               | 5                                   | 1.50E-07   | GO:0008215            | spermine metabolic process                         |
|           | 3                               | 6                                   | 3.00E-07   | GO:0004014            | adenosylmethionine decarboxylase activity          |
|           | 3                               | 8                                   | 8.40E-07   | GO:0008295            | spermidine biosynthetic process                    |
|           | 32                              | 5551                                | 8.90E-07   | GO:0005634            | nucleus                                            |
|           | 3                               | 9                                   | 1.30E-06   | GO:0008216            | spermidine metabolic process                       |
|           | 3                               | 9                                   | 1.30E-06   | GO:0016538            | cyclin-dependent protein kinase regulator activity |
|           | 15                              | 1388                                | 1.40E-06   | GO:0006996            | organelle organization and biogenesis              |
|           | 9                               | 470                                 | 2.60E-06   | GO:0051276            | chromosome organization and biogenesis             |
|           | 3                               | 12                                  | 3.30E-06   | GO:0006596            | polyamine biosynthetic process                     |
|           | 43                              | 9656                                | 4.00E-06   | GO:0043229            | intracellular organelle                            |
|           | 5                               | 100                                 | 5.30E-06   | GO:0000786            | nucleosome                                         |
|           | 3                               | 15                                  | 6.70E-06   | GO:0006595            | polyamine metabolic process                        |
|           | 18                              | 2346                                | 1.30E-05   | GO:0043228            | non-membrane-bounded organelle                     |
|           | 18                              | 2346                                | 1.30E-05   | GO:0043232            | intracellular non-membrane-bounded organelle       |
|           | 8                               | 454                                 | 1.80E-05   | GO:0005694            | chromosome                                         |
|           | 47                              | 11718                               | 1.80E-05   | GO:0044424            | intracellular part                                 |
|           | 6                               | 225                                 | 2.20E-05   | GO:0065004            | protein-DNA complex assembly                       |
|           | 5                               | 139                                 | 2.60E-05   | GO:0006334            | nucleosome assembly                                |
|           | 4                               | 71                                  | 3.10E-05   | GO:0006576            | biogenic amine metabolic process                   |
|           | 37                              | 8221                                | 3.40E-05   | GO:0043231            | intracellular membrane-bounded organelle           |
|           | 23                              | 3862                                | 4.00E-05   | GO:0044446            | intracellular organelle part                       |
|           | 23                              | 3872                                | 4.10E-05   | GO:0044422            | organelle part                                     |
| 5         | 157                             | 4.70E-05                            | GO:0031497 | chromatin assembly    |                                                    |
| 9         | 679                             | 4.90E-05                            | GO:0006259 | DNA metabolic process |                                                    |

| Cluster # | Number of genes in this cluster | Number of genes in this GO category | P-value  | GO category | Enriched functional category                         |
|-----------|---------------------------------|-------------------------------------|----------|-------------|------------------------------------------------------|
| 35        | 4                               | 19                                  | 4.00E-08 | GO:0007051  | spindle organization and biogenesis                  |
|           | 8                               | 292                                 | 6.50E-08 | GO:0000279  | M phase                                              |
|           | 8                               | 323                                 | 1.40E-07 | GO:0000278  | mitotic cell cycle                                   |
|           | 7                               | 218                                 | 1.60E-07 | GO:0007067  | mitosis                                              |
|           | 7                               | 223                                 | 1.90E-07 | GO:0000087  | M phase of mitotic cell cycle                        |
|           | 8                               | 359                                 | 3.20E-07 | GO:0022403  | cell cycle phase                                     |
|           | 7                               | 283                                 | 9.20E-07 | GO:0007017  | microtubule-based process                            |
|           | 8                               | 452                                 | 1.80E-06 | GO:0022402  | cell cycle process                                   |
|           | 10                              | 810                                 | 2.10E-06 | GO:0007049  | cell cycle                                           |
|           | 5                               | 114                                 | 2.30E-06 | GO:0000226  | microtubule cytoskeleton organization and biogenesis |
|           | 6                               | 245                                 | 6.20E-06 | GO:0051301  | cell division                                        |
|           | 3                               | 22                                  | 9.10E-06 | GO:0030261  | chromosome condensation                              |
|           | 2                               | 3                                   | 1.00E-05 | GO:0045136  | development of secondary sexual characteristics      |
|           | 3                               | 32                                  | 2.90E-05 | GO:0045787  | positive regulation of cell cycle                    |
|           | 5                               | 202                                 | 3.70E-05 | GO:0019787  | small conjugating protein ligase activity            |
| 36        | 3                               | 608                                 | 9.90E-05 | GO:0004674  | protein serine/threonine kinase activity             |
| 38        | 5                               | 141                                 | 3.20E-06 | GO:0007218  | neuropeptide signaling pathway                       |
|           | 2                               | 7                                   | 5.30E-05 | GO:0005123  | death receptor binding                               |
