# Supplementary material for: Reconstruction of Gene Regulatory Modules in Cancer Cell Cycle by Multi-Source Data Integration
Source: PubMed Central journal article supplement (PMC2858157; doi:10.1371/journal.pone.0010268), 2010-04-21
Supplement: pone.0010268.s002.pdf [file pone.0010268.s002.pdf]

| Gene Symbol | Cluster # | Gene Symbol | Cluster # | Gene Symbol | Cluster # | Gene Symbol | Cluster # |
|-------------|-----------|-------------|-----------|-------------|-----------|-------------|-----------|
| RNPC3       | 0         | HSD17B11    | 12        | ZNF414      | 21        | AOC3        | 31        |
| BIRC2       | 1         | KLF6        | 12        | ZNFX1       | 21        | APEX2       | 31        |
| BLM         | 1         | MAN1A2      | 12        | ZRANB2      | 21        | ARHGDI8     | 31        |
| C14ORF106   | 1         | MID1        | 12        | ZWINT       | 21        | BTBD3       | 31        |
| C20ORF117   | 1         | MRPL19      | 12        | ANKRD10     | 22        | C14ORF130   | 31        |
| CDCA7L      | 1         | NCAPH       | 12        | ARHGAP11A   | 22        | CALM3       | 31        |
| CDCA8       | 1         | NNMT        | 12        | ARHGAP19    | 22        | CENPE       | 31        |
| CDKN3       | 1         | NT5DC1      | 12        | ARL6IP2     | 22        | CNN2        | 31        |
| CENPA       | 1         | NUSAP1      | 12        | ATF7IP      | 22        | CTSD        | 31        |
| CNIH4       | 1         | PDGFA       | 12        | BRD8        | 22        | ERN2        | 31        |
| COL7A1      | 1         | RAD21       | 12        | BUB1        | 22        | FOXM1       | 31        |
| CTCFL       | 1         | RCBTB2      | 12        | BUB3        | 22        | HCP5        | 31        |
| ARGLU1      | 1         | SEPN1       | 12        | CCDC88A     | 22        | HELLS       | 31        |
| ERN2        | 1         | SFPQ        | 12        | CDC7        | 22        | HMGB3       | 31        |
| HELLS       | 1         | SLC17A2     | 12        | CDCA5       | 22        | IFIT2       | 31        |
| HORMAD1     | 1         | STIL        | 12        | CENPM       | 22        | KIAA0586    | 31        |
| HP1BP3      | 1         | TIMP1       | 12        | CFD         | 22        | KIF5B       | 31        |
| LMNB1       | 1         | TOP2A       | 12        | CROP        | 22        | KIFC1       | 31        |
| MAN1A2      | 1         | TSC22D1     | 12        | CTNNA1      | 22        | LNPEP       | 31        |
| MAP3K2      | 1         | WWC1        | 12        | DNAJC3      | 22        | MAD2L1      | 31        |
| FBXL20      | 1         | ZWINT       | 12        | ESCO2       | 22        | ME3         | 31        |
| KIAA0101    | 1         | ARGLU1      | 13        | FAM83D      | 22        | MEGF9       | 31        |
| MPHOSPH1    | 1         | TTLL7       | 13        | FKBP1A      | 22        | MLF1IP      | 31        |
| NIPBL       | 1         | CEP55       | 14        | ILF2        | 22        | MRP63P6     | 31        |
| NSUN5C      | 1         | FAM60A      | 14        | INADL       | 22        | NUP43       | 31        |
| NUCKS1      | 1         | HCFC1       | 14        | INSM1       | 22        | OGT         | 31        |
| PACS1       | 1         | MELK        | 14        | INTS7       | 22        | ORMDL1      | 31        |
| PIF1        | 1         | SORL1       | 14        | ITFG1       | 22        | OSGIN2      | 31        |
| RGS3        | 1         | TOP2A       | 14        | ITPR1       | 22        | PLCXD1      | 31        |
| SEPHS1      | 1         | WDR90       | 14        | JMJD2A      | 22        | PSCD2       | 31        |
| SH3GL2      | 1         | ABCC2       | 15        | KBTBD2      | 22        | RNPC3       | 31        |
| STAT5B      | 1         | ADAMTS1     | 15        | KIAA1712    | 22        | RRP1        | 31        |
| THRAP3      | 1         | BIRC5       | 15        | MAN1A2      | 22        | SERPINB4    | 31        |
| TNPO1       | 1         | C14ORF68    | 15        | MAP3K15     | 22        | SKIP        | 31        |
| TOMM70A     | 1         | CAPS        | 15        | MBD4        | 22        | SLIT2       | 31        |
| TRA2A       | 1         | CDC27       | 15        | MCM4        | 22        | TSKU        | 31        |
| WDR68       | 1         | CEP57       | 15        | MEPCE       | 22        | ACD         | 32        |
| APOA1BP     | 2         | CHAF1B      | 15        | MRPS2       | 22        | ANKRD40     | 32        |
| ARMC1       | 2         | DNAJB4      | 15        | MTMR15      | 22        | ARHGAP8     | 32        |
| ASXL1       | 2         | FAM64A      | 15        | NR5A2       | 22        | BBS2        | 32        |
| C12ORF32    | 2         | FEN1        | 15        | NUF2        | 22        | BMP2        | 32        |
| C6ORF166    | 2         | FRZB        | 15        | ORC1L       | 22        | C13ORF3     | 32        |
| CDC25A      | 2         | FZR1        | 15        | PBK         | 22        | CCDC90B     | 32        |
| CDC25C      | 2         | GINS3       | 15        | PLCXD1      | 22        | CCNE1       | 32        |
| CDKN1B      | 2         | HIST2H4B    | 15        | POLA1       | 22        | CDC45L      | 32        |
| CIITA       | 2         | HIST2H4B    | 15        | PTGER3      | 22        | CKS1B       | 32        |

| Gene Symbol | Cluster # | Gene Symbol | Cluster # | Gene Symbol | Cluster # | Gene Symbol | Cluster # |
|-------------|-----------|-------------|-----------|-------------|-----------|-------------|-----------|
| CIT         | 2         | HRSP12      | 15        | PTMS        | 22        | DONSON      | 32        |
| CKAP2       | 2         | IL18BP      | 15        | RAD51       | 22        | DYNC1LI2    | 32        |
| DNAJB9      | 2         | KIAA0182    | 15        | RBBP8       | 22        | ERN2        | 32        |
| FABP1       | 2         | KIAA1586    | 15        | RCCD1       | 22        | FANCA       | 32        |
| FLJ13231    | 2         | MCM8        | 15        | RFC4        | 22        | FLJ20699    | 32        |
| GIN52       | 2         | NCOA3       | 15        | RNF141      | 22        | GOT1        | 32        |
| GOLGA8A     | 2         | NEK2        | 15        | SETD8P1     | 22        | HIST1H2BB   | 32        |
| GSPT1       | 2         | NUP98       | 15        | SLBP        | 22        | HIST3H2A    | 32        |
| HERPUD2     | 2         | PCF11       | 15        | SMTN        | 22        | HLA-DOA     | 32        |
| HSPC157     | 2         | POLD3       | 15        | SP1         | 22        | HMGB2       | 32        |
| IFNAR1      | 2         | PPP1R2      | 15        | TXNDC9      | 22        | HMGB3       | 32        |
| IVNS1ABP    | 2         | RANGAP1     | 15        | UBE2D3      | 22        | HTF9C       | 32        |
| KDELC1      | 2         | SGCD        | 15        | ZC3HC1      | 22        | INTS7       | 32        |
| KIAA1147    | 2         | STAT5B      | 15        | ZNHIT2      | 22        | ITGB3       | 32        |
| KIAA1370    | 2         | UBE2T       | 15        | AHI1        | 23        | KIFC2       | 32        |
| KIAA1524    | 2         | ZSCAN5      | 15        | BARD1       | 23        | LMBRD2      | 32        |
| KIF5B       | 2         | ATAD2       | 16        | C15ORF23    | 23        | MAP3K15     | 32        |
| LARP7       | 2         | CCNB2       | 16        | INCENP      | 23        | MDM2        | 32        |
| MNX1        | 2         | DHFR        | 16        | LRCH1       | 23        | MED31       | 32        |
| MZF1        | 2         | E2F5        | 16        | BTBD3       | 24        | NCOA5       | 32        |
| NFIA        | 2         | ENOSF1      | 16        | C1ORF103    | 24        | OSGIN2      | 32        |
| NUDT4       | 2         | FAM115A     | 16        | C3ORF60     | 24        | PDXP        | 32        |
| NUSAP1      | 2         | GADD45A     | 16        | CCDC99      | 24        | PHTF1       | 32        |
| PANK2       | 2         | HIF1A       | 16        | CCNE2       | 24        | RFC4        | 32        |
| PLK2        | 2         | HSPA8       | 16        | CDH24       | 24        | RNF126      | 32        |
| POLQ        | 2         | INDO        | 16        | CENPF       | 24        | RNF141      | 32        |
| PRKAR1A     | 2         | INSR        | 16        | CENTB5      | 24        | SAP30       | 32        |
| PSEN1       | 2         | KIAA0841    | 16        | CKAP5       | 24        | SLC38A2     | 32        |
| PTPN4       | 2         | KIAA1598    | 16        | CTNND1      | 24        | STCH        | 32        |
| PVRIG       | 2         | KLHDC5      | 16        | CXCL14      | 24        | TFF3        | 32        |
| QRICH1      | 2         | KPNB1       | 16        | DNAJB1      | 24        | TMEM132A    | 32        |
| RAD51C      | 2         | LBR         | 16        | DSP         | 24        | TPX2        | 32        |
| RAN         | 2         | MNT         | 16        | ELP3        | 24        | TRIP13      | 32        |
| RGS3        | 2         | NEK2        | 16        | FREQ        | 24        | TTK         | 32        |
| RHEB        | 2         | NEK4        | 16        | FYN         | 24        | TUBB2C      | 32        |
| RHOBTB3     | 2         | PMS2        | 16        | FZR1        | 24        | UBE2C       | 32        |
| RNF113A     | 2         | RPL13A      | 16        | GLI1        | 24        | UBE2C       | 32        |
| SGK1        | 2         | SDC1        | 16        | HIST2H4B    | 24        | BRCA1       | 33        |
| TLE3        | 2         | SFRS5       | 16        | HS2ST1      | 24        | C20ORF111   | 33        |
| TOP1        | 2         | SLC25A45    | 16        | HSPB8       | 24        | CIT         | 33        |
| UACA        | 2         | SPAG5       | 16        | INTS8       | 24        | DCC1        | 33        |
| VPS37C      | 2         | TFAP2A      | 16        | KIAA1333    | 24        | DIS3        | 33        |
| WDR76       | 2         | TGIF1       | 16        | KIF14       | 24        | DTL         | 33        |
| PPP1R10     | 3         | TLOC1       | 16        | KRAS        | 24        | DUSP4       | 33        |
| AMD1        | 4         | ZNF24       | 16        | LMNA        | 24        | EFHC1       | 33        |
| APOA1BP     | 4         | C9ORF100    | 17        | MLF1IP      | 24        | GPSM2       | 33        |

| Gene Symbol | Cluster # | Gene Symbol | Cluster # | Gene Symbol | Cluster # | Gene Symbol | Cluster # |
|-------------|-----------|-------------|-----------|-------------|-----------|-------------|-----------|
| BAG3        | 4         | CKS2        | 17        | MSH2        | 24        | KPNA2       | 33        |
| CCDC14      | 4         | DYNLL1      | 17        | MUC1        | 24        | MCM4        | 33        |
| FGA         | 4         | EIF4EBP2    | 17        | NCOA5       | 24        | PHF15       | 33        |
| HIPK2       | 4         | ESCO2       | 17        | NKTR        | 24        | ZNF281      | 33        |
| KIAA1333    | 4         | GCLM        | 17        | OSBPL6      | 24        | ZRANB2      | 33        |
| LENG8       | 4         | GOLGA8A     | 17        | PCNA        | 24        | AK3         | 34        |
| NDE1        | 4         | HIST2H4B    | 17        | PHTF2       | 24        | AMD1        | 34        |
| NR3C1       | 4         | HOXB4       | 17        | PKNOX1      | 24        | ANP32E      | 34        |
| NSUN3       | 4         | MDC1        | 17        | POM121      | 24        | AOC2        | 34        |
| ODF2        | 4         | MGAT2       | 17        | PRIM1       | 24        | ARL6IP2     | 34        |
| PCNA        | 4         | NOS1        | 17        | PRPSAP1     | 24        | ASAM        | 34        |
| RMI1        | 4         | NUP37       | 17        | PRR11       | 24        | AURKA       | 34        |
| WSB1        | 4         | PIK3CD      | 17        | RRM2        | 24        | CASP3       | 34        |
| BRD8        | 5         | PPP2CB      | 17        | SCYL1       | 24        | CCDC14      | 34        |
| CDKN2D      | 5         | PRR11       | 17        | SMARCD1     | 24        | CCNA2       | 34        |
| DMXL2       | 5         | RANGAP1     | 17        | SMC4        | 24        | CDC16       | 34        |
| FANCD2      | 5         | RNPS1       | 17        | SUV420H1    | 24        | CDC6        | 34        |
| LYAR        | 5         | SHCBP1      | 17        | TIPIN       | 24        | CKS1B       | 34        |
| MATN2       | 5         | SMARCB1     | 17        | TOP2A       | 24        | CLSPN       | 34        |
| ABCA5       | 6         | SNUPN       | 17        | TUBD1       | 24        | COQ9        | 34        |
| BRD7        | 6         | SRF         | 17        | UBQLN2      | 24        | CREBZF      | 34        |
| C13ORF34    | 6         | TLE3        | 17        | UNG         | 24        | CRK         | 34        |
| C21ORF15    | 6         | TMEM138     | 17        | VCAM1       | 24        | DCC1        | 34        |
| CDC20       | 6         | TNPO2       | 17        | ANKRD10     | 25        | DDX11       | 34        |
| CDC42       | 6         | TREX1       | 17        | C14ORF142   | 25        | DHX8        | 34        |
| CFLAR       | 6         | UBE2T       | 17        | C4B         | 25        | DNA2L       | 34        |
| CIC         | 6         | UHRF1       | 17        | CDCA3       | 25        | DNAJB6      | 34        |
| DR1         | 6         | WIBG        | 17        | CRYBA1      | 25        | DTL         | 34        |
| EBI3        | 6         | ZNF207      | 17        | DLG7        | 25        | E2F2        | 34        |
| FAM60A      | 6         | ABCC5       | 18        | FUSIP1      | 25        | EMP1        | 34        |
| GATA2       | 6         | BUB1B       | 18        | GH1         | 25        | EXO1        | 34        |
| HELLS       | 6         | CNOT10      | 18        | GMNN        | 25        | FAM110A     | 34        |
| HJURP       | 6         | DCTN6       | 18        | GOLGA8A     | 25        | FZR1        | 34        |
| HP1BP3      | 6         | DNAJA1      | 18        | GTSE1       | 25        | GOLGA8A     | 34        |
| JMJD1C      | 6         | DZIP3       | 18        | HIST1H2AC   | 25        | HCG_2026038 | 34        |
| KIAA1524    | 6         | FLAD1       | 18        | KMO         | 25        | HDAC3       | 34        |
| MAPK13      | 6         | GOLGA8A     | 18        | PCDH7       | 25        | HIST3H2A    | 34        |
| MKI67       | 6         | HN1         | 18        | PPP3CA      | 25        | HP1BP3      | 34        |
| MSH2        | 6         | KCTD2       | 18        | PRPS2       | 25        | KIAA1641    | 34        |
| MYCBP2      | 6         | M6PRBP1     | 18        | PTPN9       | 25        | KIF11       | 34        |
| NLRP2       | 6         | MCM6        | 18        | RDH11       | 25        | KIFC1       | 34        |
| PAK1IP1     | 6         | NEIL3       | 18        | SRD5A1      | 25        | LRRC17      | 34        |
| PBK         | 6         | NUP160      | 18        | STK17B      | 25        | LYRM7       | 34        |
| PSMD11      | 6         | OLR1        | 18        | USP1        | 25        | MPHOSPH1    | 34        |
| TSG101      | 6         | RRM2        | 18        | ADAM22      | 26        | N4BP3       | 34        |
| ADCK2       | 7         | SFRS3       | 18        | AFAP1       | 26        | NBPF15      | 34        |

| Gene Symbol | Cluster # | Gene Symbol | Cluster # | Gene Symbol | Cluster # | Gene Symbol | Cluster # |
|-------------|-----------|-------------|-----------|-------------|-----------|-------------|-----------|
| HSPA7       | 7         | SGK1        | 18        | AGPAT3      | 26        | NDC80       | 34        |
| RCAN1       | 7         | SYNCRIP     | 18        | AMD1        | 26        | NDE1        | 34        |
| ANLN        | 8         | TMEM138     | 18        | ARGLU1      | 26        | PRIM2       | 34        |
| AURKB       | 8         | TNS4        | 18        | ARL4A       | 26        | RANGAP1     | 34        |
| C15ORF29    | 8         | USP6NL      | 18        | BAIAP2      | 26        | SFPQ        | 34        |
| C21ORF87    | 8         | WDR51A      | 18        | C14ORF57    | 26        | SLC22A3     | 34        |
| CCND1       | 8         | WDR63       | 18        | C9ORF100    | 26        | SS18        | 34        |
| CDC25A      | 8         | WSB1        | 18        | CDC25B      | 26        | TPX2        | 34        |
| CDC27       | 8         | ANKRD25     | 19        | CDCA7       | 26        | TROAP       | 34        |
| CIC         | 8         | AP3D1       | 19        | CEP70       | 26        | UBE2S       | 34        |
| DCP1A       | 8         | ARL6IP2     | 19        | CKAP2       | 26        | UBL3        | 34        |
| FYN         | 8         | EFHC1       | 19        | COQ6        | 26        | UBXD5       | 34        |
| HMMR        | 8         | FLJ13231    | 19        | CRLS1       | 26        | VCL         | 34        |
| ITPR3       | 8         | IFIT1       | 19        | G3BP1       | 26        | WDR68       | 34        |
| MASTL       | 8         | KIAA1641    | 19        | GCSH        | 26        | Y18H1A.11   | 34        |
| MCM2        | 8         | MKI67       | 19        | GRK6        | 26        | ZMYM1       | 34        |
| PRR16       | 8         | PKMYT1      | 19        | HIST1H2AC   | 26        | ABCA7       | 35        |
| ROCK1       | 8         | PPP2R2A     | 19        | HIST2H4B    | 26        | AURKA       | 35        |
| SLBP        | 8         | PWP1        | 19        | INSIG2      | 26        | B4GALT1     | 35        |
| SPTBN1      | 8         | SSR3        | 19        | KAZALD1     | 26        | BIVM        | 35        |
| ANKRD10     | 9         | TMPO        | 19        | KRAS        | 26        | C4BPB       | 35        |
| BUB3        | 9         | TUBB2C      | 19        | MCAM        | 26        | CALD1       | 35        |
| C4ORF30     | 9         | USP53       | 19        | MET         | 26        | CCNF        | 35        |
| C6          | 9         | ZNF24       | 19        | MITF        | 26        | CDKL5       | 35        |
| C9ORF140    | 9         | ANTXR1      | 20        | NAB1        | 26        | CDKN2AIP    | 35        |
| CALM3       | 9         | ARHGAP19    | 20        | PHIP        | 26        | CENPL       | 35        |
| CCND1       | 9         | ARL6IP1     | 20        | SAPS3       | 26        | CHML        | 35        |
| CD97        | 9         | ASIP        | 20        | SLC4A1AP    | 26        | CIC         | 35        |
| CDC25B      | 9         | ATAD2       | 20        | SMC4        | 26        | CKS2        | 35        |
| CDH24       | 9         | BMI1        | 20        | TLE3        | 26        | DEPDC1      | 35        |
| CHGN        | 9         | CADM1       | 20        | TOP3A       | 26        | FAM113A     | 35        |
| DEPDC7      | 9         | CAPN7       | 20        | TPX2        | 26        | GMNN        | 35        |
| DIAPH3      | 9         | CENPQ       | 20        | TTC31       | 26        | HLA-DRA     | 35        |
| DONSON      | 9         | ESCO2       | 20        | TUBA1A      | 26        | HMGCR       | 35        |
| G3BP1       | 9         | ESD         | 20        | TYMS        | 26        | HTF9C       | 35        |
| GDF15       | 9         | FKBP1A      | 20        | WDR62       | 26        | IFIT1       | 35        |
| GNB3        | 9         | H2AFX       | 20        | WDR68       | 26        | KIAA0802    | 35        |
| GPR126      | 9         | HIST1H2AM   | 20        | ZBTB7A      | 26        | NCAPD2      | 35        |
| GRPEL1      | 9         | ITGB3BP     | 20        | CASP2       | 27        | NDE1        | 35        |
| HDAC3       | 9         | KIF2C       | 20        | CBX3        | 27        | NMB         | 35        |
| HELLS       | 9         | LMO4        | 20        | CHAF1A      | 27        | NUSAP1      | 35        |
| HRB         | 9         | LOC199800   | 20        | CKS1B       | 27        | PCF11       | 35        |
| HSPA2       | 9         | NCOA5       | 20        | DHFR        | 27        | PSCD3       | 35        |
| HSPA8       | 9         | RAD51AP1    | 20        | DKC1        | 27        | RERE        | 35        |
| IDI2        | 9         | RECQL4      | 20        | DUSP4       | 27        | SPAG5       | 35        |
| KCTD9       | 9         | SFRS3       | 20        | EIF2A       | 27        | SREBF1      | 35        |

| Gene Symbol | Cluster # | Gene Symbol | Cluster # | Gene Symbol | Cluster # | Gene Symbol | Cluster # |
|-------------|-----------|-------------|-----------|-------------|-----------|-------------|-----------|
| KIF23       | 9         | SFRS7       | 20        | HIST2H3PS2  | 27        | STAT5B      | 35        |
| KIF5B       | 9         | SLC25A36    | 20        | HMG20B      | 27        | SVIP        | 35        |
| KLF6        | 9         | SUCLG2      | 20        | HPS4        | 27        | TAF9        | 35        |
| KLF9        | 9         | TOB2        | 20        | KIAA1529    | 27        | TRIM26      | 35        |
| KMO         | 9         | TUBA3C      | 20        | KIF22       | 27        | TUBA4A      | 35        |
| LPP         | 9         | ZFX         | 20        | KIF5B       | 27        | UBE2C       | 35        |
| MCM2        | 9         | ALKBH1      | 21        | PEBP4       | 27        | UBE2C       | 35        |
| MCM8        | 9         | AP3M2       | 21        | PNN         | 27        | VANGL1      | 35        |
| MCM5        | 9         | ASF1B       | 21        | POLD3       | 27        | VEGFC       | 35        |
| NFE2L2      | 9         | ASPHD2      | 21        | RAB23       | 27        | ZCCHC10     | 35        |
| NFIC        | 9         | ATF7IP      | 21        | RBM8A       | 27        | ZNF521      | 35        |
| NUF2        | 9         | BRIP1       | 21        | SLC38A2     | 27        | CCRK        | 36        |
| PASK        | 9         | C15ORF29    | 21        | SV2B        | 27        | DMTF1       | 36        |
| PCAF        | 9         | CDC2        | 21        | AP4B1       | 28        | RPS25       | 36        |
| PLK1        | 9         | CDK7        | 21        | ASXL1       | 28        | UHRF1       | 37        |
| PSMG3       | 9         | CTCF        | 21        | BRD8        | 28        | AKAP13      | 38        |
| PTTG1       | 9         | CYB5R2      | 21        | C14ORF106   | 28        | ANP32B      | 38        |
| RRM1        | 9         | DEPDC1B     | 21        | CCNB1       | 28        | ANP32E      | 38        |
| RUNX1       | 9         | DHFR        | 21        | CDK7        | 28        | C16ORF57    | 38        |
| SCML1       | 9         | E2F1        | 21        | CEP350      | 28        | C1ORF2      | 38        |
| SHC1        | 9         | EIF4E       | 21        | CNTROB      | 28        | CASP2       | 38        |
| SLC25A27    | 9         | ESPL1       | 21        | DEXI        | 28        | CDKN2AIP    | 38        |
| TOPBP1      | 9         | FAM105B     | 21        | KIAA1333    | 28        | CDR2        | 38        |
| TTC31       | 9         | FXR1        | 21        | RSRC2       | 28        | CHEK2       | 38        |
| USP1        | 9         | GAS1        | 21        | TRAIIP      | 28        | CTR9        | 38        |
| USP16       | 9         | GAS6        | 21        | ZPBP        | 28        | DNAJB1      | 38        |
| VANGL1      | 9         | GATA2       | 21        | CCNA2       | 29        | ECT2        | 38        |
| WSB1        | 9         | GNB1        | 21        | CDC42EP1    | 29        | FADD        | 38        |
| YWHAH       | 9         | HIST2H4B    | 21        | CDKN2C      | 29        | FEM1B       | 38        |
| ZNF593      | 9         | HMG20B      | 21        | DLG7        | 29        | FRS2        | 38        |
| ACYP1       | 10        | HSPB8       | 21        | GABPB2      | 29        | GPR126      | 38        |
| CD24        | 10        | JARID1B     | 21        | HELLS       | 29        | GTSE1       | 38        |
| CDC42EP4    | 10        | MAP3K7IP2   | 21        | KATNA1      | 29        | HMGB2       | 38        |
| CREBZF      | 10        | MCM6        | 21        | KIAA1586    | 29        | HSF2        | 38        |
| HIST2H2AA3  | 10        | MDM1        | 21        | MAP3K15     | 29        | IFIT1       | 38        |
| KIAA0182    | 10        | NASP        | 21        | MCM6        | 29        | KCNC4       | 38        |
| KPNA2       | 10        | NFKBIL2     | 21        | MND1        | 29        | MLLT4       | 38        |
| TAF15       | 10        | NUCKS1      | 21        | MZF1        | 29        | NY-SAR-48   | 38        |
| TSN         | 10        | ODF2        | 21        | NPAT        | 29        | ORC3L       | 38        |
| WSB1        | 10        | OGT         | 21        | PPP1R10     | 29        | PLAG1       | 38        |
| ANLN        | 11        | PTP4A1      | 21        | PRC1        | 29        | RAD18       | 38        |
| HJURP       | 11        | RAB3A       | 21        | RPA2        | 29        | RFC2        | 38        |
| ACPP        | 12        | RAD54L      | 21        | STAG1       | 29        | RPS25       | 38        |
| ASXL1       | 12        | REEP1       | 21        | TCERG1      | 29        | SLC39A10    | 38        |
| ATF7IP      | 12        | SAP30BP     | 21        | TMEM140     | 29        | SLC44A2     | 38        |
| AURKB       | 12        | SGK1        | 21        | VANGL1      | 29        | SLC9A3      | 38        |

| <b>Gene Symbol</b> | <b>Cluster #</b> | <b>Gene Symbol</b> | <b>Cluster #</b> | <b>Gene Symbol</b> | <b>Cluster #</b> | <b>Gene Symbol</b> | <b>Cluster #</b> |
|--------------------|------------------|--------------------|------------------|--------------------|------------------|--------------------|------------------|
| BCLAF1             | 12               | SP1                | 21               | ANP32E             | 30               | STAG3L2            | 38               |
| C6ORF166           | 12               | TRIM45             | 21               | CFLAR              | 30               | TACC3              | 38               |
| CASP8AP2           | 12               | TUBB2A             | 21               | E2F1               | 30               | TOMM34             | 38               |
| CLSPN              | 12               | USP13              | 21               | KIF23              | 30               | TULP4              | 38               |
| DET1               | 12               | VANGL1             | 21               | MCM4               | 30               | TXNRD1             | 38               |
| FANCG              | 12               | VPS25              | 21               | MCM5               | 30               | USP1               | 38               |
| GOLGA8A            | 12               | XPO4               | 21               | WISP1              | 30               | ZNF217             | 38               |
| HN1                | 12               | ZBED5              | 21               | ADH4               | 31               | ZNF587             | 38               |
