# Supplementary material for: Reconstruction of Gene Regulatory Modules in Cancer Cell Cycle by Multi-Source Data Integration
Source: PubMed Central journal article supplement (PMC2858157; doi:10.1371/journal.pone.0010268), 2010-04-21
Supplement: pone.0010268.s003.pdf [file pone.0010268.s003.pdf]

Table S3 – List of 46 transcription factors in human cell cycle selected as candidates to regulate downstream target genes

| <b>Gene Name</b> | <b>IMAGE ID</b>       | <b>GO number</b> | <b>Associated GO category</b> | <b>Specific role during transcription</b> |
|------------------|-----------------------|------------------|-------------------------------|-------------------------------------------|
| BCLAF1           | <b>173309</b>         | GO:0045449       | Regulation of transcription   | Transcriptional repressor                 |
| BRCA1            | <b>241474</b>         | GO:0045449       | Regulation of transcription   | Transcriptional activator/repressor       |
| BRD8             | <b>815287</b>         | GO:0003700       | Transcription factor activity | Transcriptional coactivator               |
| CDK7             | <b>1915416/130242</b> | GO:0045449       | Regulation of transcription   | Transcriptional activator                 |
| CIITA            | <b>1536451</b>        | GO:0045449       | Regulation of transcription   | Transcriptional activator/repressor       |
| CTCF             | <b>240367</b>         | GO:0003700       | Transcription factor activity | Transcriptional activator/repressor       |
| DMTF1            | <b>490728</b>         | GO:0003700       | Transcription factor activity | Transcriptional activator                 |
| DR1              | <b>487797/566760</b>  | GO:0045449       | Regulation of transcription   | Transcriptional repressor                 |
| DSCR1            | <b>884462</b>         | GO:0003700       | Transcription factor activity | Transcriptional repressor                 |
| E2F1             | <b>236142/768260</b>  | GO:0003700       | Transcription factor activity | Transcriptional activator                 |
| E2F2             | <b>293331</b>         | GO:0003700       | Transcription factor activity | Transcriptional activator                 |
| FOXM1            | <b>564803</b>         | GO:0003700       | Transcription factor activity | Transcriptional activator                 |
| GATA2            | <b>149809/135688</b>  | GO:0003700       | Transcription factor activity | Transcriptional activator                 |
| GTF3C4           | <b>780958/291827</b>  | GO:0005667       | Transcription factor complex  | Transcriptional activator                 |
| HCFC1            | <b>344049</b>         | GO:0003700       | Transcription factor activity | Transcriptional activator/repressor       |
| HIF1A            | <b>897806</b>         | GO:0003700       | Transcription factor activity | Transcriptional activator                 |
| HMG20B           | <b>878184</b>         | GO:0003700       | Transcription factor activity | Transcriptional repressor                 |
| HMGB2            | <b>1842250/363103</b> | GO:0003700       | Transcription factor activity | Transcriptional repressor                 |
| ILF2             | <b>242952</b>         | GO:0045449       | Regulation of transcription   | Transcriptional activator                 |
| KDM5B            | <b>838829</b>         | GO:0003700       | Transcription factor activity | Transcriptional repressor                 |
| KLF6             | <b>510381</b>         | GO:0003700       | Transcription factor activity | Transcriptional activator                 |
| KLF9             | <b>302549</b>         | GO:0003700       | Transcription factor activity | Transcriptional activator/repressor       |
| MAPK13           | <b>590774</b>         | GO:0045449       | Regulation of transcription   | Transcriptional repressor                 |
| MNT              | <b>809731</b>         | GO:0003700       | Transcription factor activity | Transcriptional repressor                 |
| NCOA3            | <b>197520</b>         | GO:0045449       | Regulation of transcription   | Transcriptional coactivator               |
| NFE2L2           | <b>884438</b>         | GO:0003700       | Transcription factor activity | Transcriptional activator                 |
| NFIC             | <b>1455463/265874</b> | GO:0003700       | Transcription factor activity | Transcriptional activator                 |
| NR3C1            | <b>271198</b>         | GO:0003700       | Transcription factor activity | Transcriptional coactivator               |
| NR5A2            | <b>245517</b>         | GO:0003700       | Transcription factor activity | Transcriptional activator                 |
| PCNA             | <b>43229/789182</b>   | GO:0006275       | Regulation of transcription   | Transcriptional repressor                 |
| PHTF2            | <b>30114</b>          | GO:0045449       | Regulation of transcription   | Transcriptional activator/repressor       |
| PKNOX1           | <b>1947972</b>        | GO:0003700       | Transcription factor activity | Transcriptional activator                 |
| PTTG1            | <b>2018976/781089</b> | GO:0003700       | Transcription factor activity | Transcriptional activator/repressor       |
| RBPJ             | <b>845502</b>         | GO:0045449       | Regulation of transcription   | Transcriptional repressor                 |

| <b>Gene Name</b> | <b>IMAGE ID</b>             | <b>GO number</b> | <b>Associated GO category</b> | <b>Specific role during transcription</b> |
|------------------|-----------------------------|------------------|-------------------------------|-------------------------------------------|
| SCML1            | <b>202704</b>               | GO:0003700       | Transcription factor activity | Transcriptional repressor                 |
| SP1              | <b>782622/80318</b>         | GO:0003700       | Transcription factor activity | Transcriptional activator                 |
| SRF              | <b>840636</b>               | GO:0003700       | Transcription factor activity | Transcriptional activator                 |
| STAT1            | <b>545503</b>               | GO:0003700       | Transcription factor activity | Transcriptional activator                 |
| STAT5B           | <b>134120/712840/132857</b> | GO:0003700       | Transcription factor activity | Transcriptional activator                 |
| TCERG1           | <b>272192</b>               | GO:0045449       | Regulation of transcription   | Transcriptional coactivator               |
| TFAP2A           | <b>137387</b>               | GO:0003700       | Transcription factor activity | Transcriptional activator/repressor       |
| TSC22D1          | <b>868630</b>               | GO:0003700       | Transcription factor activity | Transcriptional repressor                 |
| UHRF1            | <b>366414/1550739</b>       | GO:0003700       | Transcription factor activity | Transcriptional activator                 |
| ZNF207           | <b>246869</b>               | GO:0003700       | Transcription factor activity | Transcriptional activator/repressor       |
| ZNF24            | <b>296429</b>               | GO:0003700       | Transcription factor activity | Transcriptional repressor                 |
| ZNF281           | <b>280750</b>               | GO:0003700       | Transcription factor activity | Transcriptional repressor                 |

The table lists the transcription factors through their gene names and IMAGE IDs that refer to the probes used in the original microarray data (Whitfield et al. 2002). The expression profiles of bolded IMAGE IDs were used in further prediction steps.

## References

Whitfield ML, Sherlock G, Saldanha AJ, Murray JI, Ball CA et al. (2002) Identification of genes periodically expressed in the human cell cycle and their expression in tumors. *Mol Biol Cell* 13(6): 1977-2000.
