# Supplementary material for: Reconstruction of Gene Regulatory Modules in Cancer Cell Cycle by Multi-Source Data Integration
Source: PubMed Central journal article supplement (PMC2858157; doi:10.1371/journal.pone.0010268), 2010-04-21
Supplement: pone.0010268.s004.pdf [file pone.0010268.s004.pdf]

| <b>E2F Target Genes Listed in Bracken et al. (2004) and Present in the List of Genes Analyzed</b> | <b>Included in the Gene Modules Identified (Y/N)</b> |
|---------------------------------------------------------------------------------------------------|------------------------------------------------------|
| AURKB                                                                                             | N                                                    |
| BARD1                                                                                             | N                                                    |
| BMP2                                                                                              | N                                                    |
| BRCA1                                                                                             | N                                                    |
| BUB1                                                                                              | N                                                    |
| BUB1B                                                                                             | N                                                    |
| BUB3                                                                                              | N                                                    |
| CASP3                                                                                             | N                                                    |
| CCNA2                                                                                             | Y                                                    |
| CCND1                                                                                             | Y                                                    |
| CCNE1                                                                                             | Y                                                    |
| CCNE2                                                                                             | N                                                    |
| CDC2                                                                                              | Y                                                    |
| CDC20                                                                                             | N                                                    |
| CDC25A                                                                                            | Y                                                    |
| CDC45L                                                                                            | Y                                                    |
| CDC6                                                                                              | Y                                                    |
| CDKN2C                                                                                            | Y                                                    |
| CDKN2D                                                                                            | N                                                    |
| CENPE                                                                                             | N                                                    |
| CKS2                                                                                              | N                                                    |
| DHFR                                                                                              | N                                                    |
| E2F1                                                                                              | Y                                                    |
| E2F2                                                                                              | Y                                                    |
| FEN1                                                                                              | N                                                    |
| MAD2L1                                                                                            | N                                                    |
| MCM2                                                                                              | Y                                                    |
| MCM4                                                                                              | Y                                                    |
| MCM5                                                                                              | Y                                                    |
| MCM6                                                                                              | Y                                                    |
| MSH2                                                                                              | N                                                    |
| NPAT                                                                                              | Y                                                    |
| ORC1L                                                                                             | N                                                    |
| PCNA                                                                                              | N                                                    |
| PMS2                                                                                              | N                                                    |
| PRC1                                                                                              | N                                                    |
| RAD51                                                                                             | N                                                    |
| RAD54L                                                                                            | N                                                    |
| RFC2                                                                                              | N                                                    |
| RFC4                                                                                              | N                                                    |
| RPA2                                                                                              | N                                                    |
| RRM1                                                                                              | N                                                    |
| RRM2                                                                                              | N                                                    |
| TOP2A                                                                                             | N                                                    |
| TTK                                                                                               | N                                                    |
| TYMS                                                                                              | N                                                    |
